# Supplementary material
Source: publisher site journal article supplement (https://www.dovepress.com/get_supplementary_file.php?f=303079.docx)
Supplement: Supplementary file 1 [file get_supplementary_file.php]

**Supplementary Table 1:** **Unadjusted difference-in-differences of resource use and cost outcomes**

| **Outcome** | **Comparison** | **Pre-ASD** | **Post-ASD** | **Difference** | ***P*-Value** | **Lower 95% CL** | **Upper 95% CL** |
| --- | --- | --- | --- | --- | --- | --- | --- |
| **Any resource use with specific claim types** |  |  |  |  |  |  |  |
| Any use of all-cause inpatient hospitalization | Generic Pre-Post Difference | 0.329 | 0.126 | -0.203 | <0.001 | -0.207 | -0.199 |
|  | ESL Pre-Post Difference | 0.140 | 0.056 | -0.084 | <0.001 | -0.128 | -0.039 |
|  | ESL - Generic DD |  |  | 0.120 | <0.001 | 0.075 | 0.164 |
| Any use of all-cause ED | Generic Pre-Post Difference | 0.312 | 0.178 | -0.134 | <0.001 | -0.138 | -0.129 |
|  | ESL Pre-Post Difference | 0.296 | 0.110 | -0.186 | <0.001 | -0.244 | -0.129 |
|  | ESL - Generic DD |  |  | -0.053 | 0.07 | -0.110 | 0.005 |
| Any use of all-cause outpatient | Generic Pre-Post Difference | 0.841 | 0.756 | -0.085 | <0.001 | -0.089 | -0.081 |
|  | ESL Pre-Post Difference | 0.932 | 0.715 | -0.217 | <0.001 | -0.262 | -0.171 |
|  | ESL - Generic DD |  |  | -0.132 | <0.001 | -0.177 | -0.086 |
| Any use of FS-related inpatient hospitalization | Generic Pre-Post Difference | 0.103 | 0.028 | -0.074 | <0.001 | -0.077 | -0.071 |
|  | ESL Pre-Post Difference | 0.052 | 0.016 | -0.036 | 0.010 | -0.064 | -0.009 |
|  | ESL - Generic DD |  |  | 0.038 | 0.007 | 0.011 | 0.066 |
| Any use of FS-related ED | Generic Pre-Post Difference | 0.019 | 0.008 | -0.011 | <0.001 | -0.012 | -0.009 |
|  | ESL Pre-Post Difference | 0.000 | 0.008 | 0.008 | 0.018 | 0.001 | 0.014 |
|  | ESL - Generic DD |  |  | 0.019 | <0.001 | 0.012 | 0.025 |
| Any use of FS-related outpatient | Generic Pre-Post Difference | 0.167 | 0.247 | 0.080 | <0.001 | 0.076 | 0.084 |
|  | ESL Pre-Post Difference | 0.512 | 0.340 | -0.172 | <0.001 | -0.239 | -0.104 |
|  | ESL - Generic DD |  |  | -0.252 | <0.001 | -0.320 | -0.184 |
| **Number of days with specific claim types** |  |  |  |  |  |  |  |
| Number of days of all-cause inpatient hospitalization | Generic Pre-Post Difference | 1.80 | 0.71 | -1.09 | <0.001 | -1.14 | -1.05 |
|  | ESL Pre-Post Difference | 0.45 | 0.18 | -0.27 | 0.019 | -0.50 | -0.05 |
|  | ESL - Generic DD |  |  | 0.82 | <0.001 | 0.59 | 1.05 |
| Number of days of all-cause ED | Generic Pre-Post Difference | 0.48 | 0.30 | -0.18 | <0.001 | -0.19 | -0.17 |
|  | ESL Pre-Post Difference | 0.41 | 0.18 | -0.23 | <0.001 | -0.32 | -0.14 |
|  | ESL - Generic DD |  |  | -0.05 | 0.29 | -0.14 | 0.04 |
| Number of days of all-cause outpatient | Generic Pre-Post Difference | 3.64 | 3.56 | -0.09 | <0.001 | -0.12 | -0.05 |
|  | ESL Pre-Post Difference | 3.67 | 2.43 | -1.24 | <0.001 | -1.61 | -0.87 |
|  | ESL - Generic DD |  |  | -1.15 | <0.001 | -1.53 | -0.78 |
| Number of days of FS-related inpatient hospitalization | Generic Pre-Post Difference | 0.73 | 0.31 | -0.43 | <0.001 | -0.46 | -0.39 |
|  | ESL Pre-Post Difference | 0.29 | 0.10 | -0.19 | 0.047 | -0.37 | 0.00 |
|  | ESL - Generic DD |  |  | 0.24 | 0.014 | 0.05 | 0.43 |
| Number of days of FS-related ED | Generic Pre-Post Difference | 0.02 | 0.01 | -0.01 | <0.001 | -0.01 | -0.01 |
|  | ESL Pre-Post Difference | 0.00 | 0.01 | 0.01 | 0.019 | 0.00 | 0.02 |
|  | ESL - Generic DD |  |  | 0.02 | <0.001 | 0.01 | 0.03 |
| Number of days of FS-related outpatient | Generic Pre-Post Difference | 0.23 | 0.36 | 0.13 | <0.001 | 0.13 | 0.14 |
|  | ESL Pre-Post Difference | 0.77 | 0.46 | -0.32 | <0.001 | -0.44 | -0.19 |
|  | ESL - Generic DD |  |  | -0.45 | <0.001 | -0.57 | -0.32 |
| **Charges associated with specific claim types** |  |  |  |  |  |  |  |
| Total charges | Generic Pre-Post Difference | $11,053 | $8,850 | -$2,202 | <0.001 | -$2,439 | -$1,966 |
|  | ESL Pre-Post Difference | $7,608 | $5,718 | -$1,889 | 0.030 | -$3,596 | -$183 |
|  | ESL - Generic DD |  |  | $313 | 0.72 | -$1,410 | $2,036 |
| All-cause medical charges | Generic Pre-Post Difference | $10,416 | $7,896 | -$2,520 | <0.001 | -$2,754 | -$2,286 |
|  | ESL Pre-Post Difference | $7,007 | $3,385 | -$3,622 | <0.001 | -$5,220 | -$2,024 |
|  | ESL - Generic DD |  |  | -$1,102 | 0.18 | -$2,717 | $513 |
| All-cause inpatient hospitalization charges | Generic Pre-Post Difference | $2,990 | $1,082 | -$1,909 | <0.001 | -$2,011 | -$1,807 |
|  | ESL Pre-Post Difference | $729 | $297 | -$432 | 0.08 | -$918 | $54 |
|  | ESL - Generic DD |  |  | $1,477 | <0.001 | $980 | $1,973 |
| All-cause ED charges | Generic Pre-Post Difference | $2,362 | $1,214 | -$1,148 | <0.001 | -$1,216 | -$1,080 |
|  | ESL Pre-Post Difference | $1,754 | $659 | -$1,096 | <0.001 | -$1,672 | -$520 |
|  | ESL - Generic DD |  |  | $52 | 0.86 | -$528 | $632 |
| All-cause outpatient charges | Generic Pre-Post Difference | $5,063 | $5,600 | $537 | <0.001 | $338 | $735 |
|  | ESL Pre-Post Difference | $4,524 | $2,430 | -$2,094 | 0.002 | -$3,448 | -$740 |
|  | ESL - Generic DD |  |  | -$2,631 | <0.001 | -$3,999 | -$1,262 |
| FS-related inpatient hospitalization charges | Generic Pre-Post Difference | $760 | $225 | -$535 | <0.001 | -$583 | -$487 |
|  | ESL Pre-Post Difference | $377 | $70 | -$307 | 0.12 | -$691 | $77 |
|  | ESL - Generic DD |  |  | $228 | 0.25 | -$160 | $615 |
| FS-related ED charges | Generic Pre-Post Difference | $245 | $72 | -$173 | <0.001 | -$196 | -$150 |
|  | ESL Pre-Post Difference | $6 | $121 | $115 | 0.048 | $1 | $229 |
|  | ESL - Generic DD |  |  | $288 | <0.001 | $172 | $404 |
| FS-related outpatient charges | Generic Pre-Post Difference | $345 | $445 | $100 | <0.001 | $69 | $132 |
|  | ESL Pre-Post Difference | $1,080 | $634 | -$446 | 0.19 | -$1,108 | $216 |
|  | ESL - Generic DD |  |  | -$546 | 0.11 | -$1,209 | $116 |
| FS-related medical charges | Generic Pre-Post Difference | $1,349 | $742 | -$607 | <0.001 | -$669 | -$545 |
|  | ESL Pre-Post Difference | $1,462 | $824 | -$638 | 0.10 | -$1,407 | $131 |
|  | ESL - Generic DD |  |  | -$31 | 0.94 | -$803 | $741 |
| Non-FS-related medical charges | Generic Pre-Post Difference | $9,067 | $7,154 | -$1,913 | <0.001 | -$2,138 | -$1,688 |
|  | ESL Pre-Post Difference | $5,545 | $2,561 | -$2,984 | <0.001 | -$4,396 | -$1,572 |
|  | ESL - Generic DD |  |  | -$1,071 | 0.14 | -$2,501 | $359 |
| Total Rx charges | Generic Pre-Post Difference | $637 | $954 | $317 | <0.001 | $292 | $343 |
|  | ESL Pre-Post Difference | $601 | $2,333 | $1,732 | <0.001 | $1,381 | $2,084 |
|  | ESL - Generic DD |  |  | $1,415 | <0.001 | $1,062 | $1,768 |
| ASD-related Rx charges | Generic Pre-Post Difference | $13 | $215 | $201 | <0.001 | $195 | $208 |
|  | ESL Pre-Post Difference | $60 | $1,906 | $1,846 | <0.001 | $1,582 | $2,110 |
|  | ESL - Generic DD |  |  | $1,645 | <0.001 | $1,381 | $1,909 |
| Non-ASD-related prescription charges | Generic Pre-Post Difference | $623 | $740 | $116 | <0.001 | $92 | $141 |
|  | ESL Pre-Post Difference | $541 | $427 | -$114 | 0.32 | -$338 | $110 |
|  | ESL - Generic DD |  |  | -$230 | 0.045 | -$456 | -$5 |

ASD, antiseizure drug; CL, confidence limit; DD, difference-in-differences; ED, emergency department; ESL, eslicarbazepine acetate; FS, focal seizure; Rx, prescription.

**Supplementary Table 2:** **Standardized covariates differences before and after ATT weighting**

|  | **Standardized Differences** | | | **Variance Ratio** | | |
| --- | --- | --- | --- | --- | --- | --- |
| **Variable Name** | **Raw** | **Weighted** | **Raw** | | **Weighted** |
| Year of index date |  |  |  | |  |
| 2016 | -0.023 | 0.002 | 0.999 | | 1.001 |
| 2017 | -0.045 | 0.002 | 0.973 | | 1.002 |
| 2018 | 0.072 | -0.001 | 1.281 | | 0.997 |
| Patient age categorya |  |  |  | |  |
| 40 - 64 | 0.126 | 0.002 | 1.033 | | 1.000 |
| 65+ | -0.383 | 0.001 | 0.648 | | 1.002 |
| Patient genderb |  |  |  | |  |
| Female | -0.019 | 0.002 | 1.010 | | 0.999 |
| Patient age category |  |  |  | |  |
| Female*40-64 | 0.156 | 0.001 | 1.178 | | 1.001 |
| Female*Age 65+ | -0.265 | 0.000 | 0.571 | | 1.001 |
| Geographic regionc |  |  |  | |  |
| Northeast | -0.034 | 0.002 | 0.958 | | 1.002 |
| South | 0.241 | -0.003 | 1.048 | | 1.000 |
| West | -0.125 | 0.001 | 0.742 | | 1.004 |
| Rx payerd |  |  |  | |  |
| Medicaid | -0.101 | 0.001 | 0.844 | | 1.003 |
| Medicare | -0.328 | 0.001 | 0.668 | | 1.001 |
| Other | 0.127 | -0.001 | 1.650 | | 0.997 |
| Comorbidities |  |  |  | |  |
| Alcohol/drug dependence | 0.005 | 0.001 | 1.042 | | 1.007 |
| Atherosclerosis | -0.091 | 0.001 | 0.549 | | 1.007 |
| Bipolar disorder | -0.020 | 0.002 | 0.953 | | 1.004 |
| Brain tumor | -0.177 | 0.000 | 0.250 | | 1.000 |
| Congestive heart failure | -0.146 | 0.000 | 0.504 | | 1.000 |
| CNS infections | -0.135 | 0.001 | 0.602 | | 1.004 |
| Cognitive impairment | -0.304 | 0.001 | 0.360 | | 1.003 |
| Chronic pulmonary disease | -0.204 | 0.001 | 0.518 | | 1.003 |
| Cerebrovascular disease | -0.291 | 0.001 | 0.615 | | 1.001 |
| Dementia | -0.109 | 0.001 | 0.533 | | 1.007 |
| Intellectual disability | 0.022 | -0.001 | 1.308 | | 0.994 |
| Diabetes without chronic complication | -0.198 | 0.001 | 0.607 | | 1.002 |
| Diabetes with chronic complication | -0.119 | 0.000 | 0.538 | | 0.999 |
| Falls and fractures | -0.100 | 0.000 | 0.689 | | 1.002 |
| Hypertension | -0.376 | 0.002 | 0.665 | | 1.003 |
| Major depressive disorder | -0.007 | 0.001 | 0.983 | | 1.004 |
| Mild liver disease | -0.145 | 0.001 | 0.305 | | 1.007 |
| Myocardial infarction | -0.099 | 0.000 | 0.479 | | 1.002 |
| Hyponatremia | -0.103 | 0.001 | 0.516 | | 1.007 |
| Nervous system neoplasms | -0.115 | 0.001 | 0.613 | | 1.003 |
| Parkinson's disease | -0.054 | 0.000 | 0.490 | | 1.001 |
| Hemiplegia or paraplegia | -0.213 | 0.001 | 0.259 | | 1.006 |
| Peptic ulcer disease | -0.015 | 0.004 | 0.804 | | 1.068 |
| Peripheral vascular disease | -0.148 | 0.001 | 0.444 | | 1.006 |
| Renal disease | -0.265 | 0.000 | 0.206 | | 1.003 |
| Rheumatic disease | 0.026 | 0.002 | 1.188 | | 1.013 |
| Schizophrenia | -0.044 | 0.000 | 0.555 | | 0.996 |
| Sleep apnea | 0.077 | 0.000 | 1.315 | | 1.001 |
| Traumatic brain injury | -0.037 | 0.001 | 0.863 | | 1.005 |
| Charges associated with specific claim types |  |  |  | |  |
| FS-related inpatient hospitalization charges | -0.094 | -0.001 | 0.397 | | 0.580 |
| FS-related emergency department charges | -0.144 | 0.000 | 0.001 | | 0.500 |
| FS-related outpatient charges | 0.211 | -0.005 | 2.659 | | 0.418 |
| Non-FS-related medical charges | -0.184 | 0.001 | 0.248 | | 0.762 |
| ASD-related prescription charges | 0.122 | -0.039 | 9.904 | | 0.330 |
| Non-ASD-related prescription charges | -0.034 | 0.000 | 0.679 | | 0.796 |
| Number of days with specific claim types |  |  |  | |  |
| Number of days of all-cause inpatient hospitalization | -0.364 | 0.000 | 0.125 | | 1.639 |
| Number of days of all-cause emergency department | -0.080 | 0.001 | 0.663 | | 0.814 |
| Number of days of all-cause outpatient | 0.007 | -0.001 | 0.690 | | 0.405 |

Reference categories: a Age: 18 – 39; b Gender: Male; c Geographic region: Midwest; d Rx payer: Commercial.
ASD, antiseizure drug; ATT, average treatment effect on the treated; FS, focal seizure; Rx, prescription.
